# Supplementary material
Source: ML conference proceedings conference paper supplement (https://openreview.net/forum?id=Na02hDWqkF)

Open

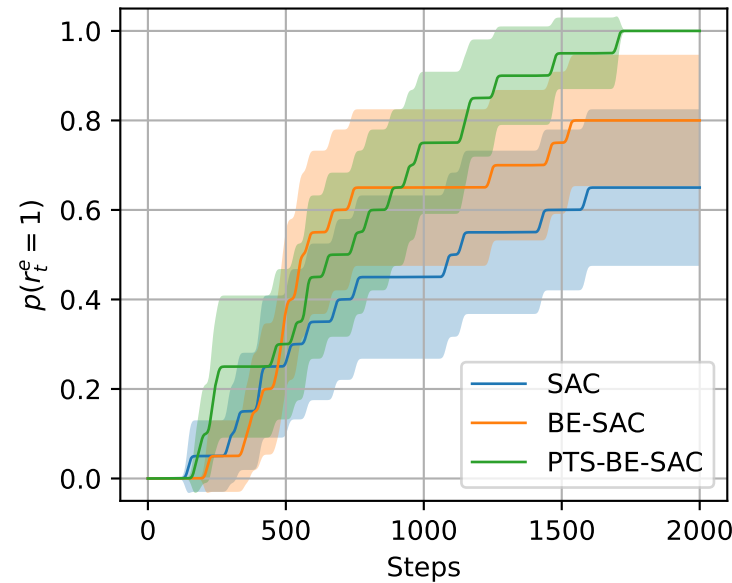

U-Shape

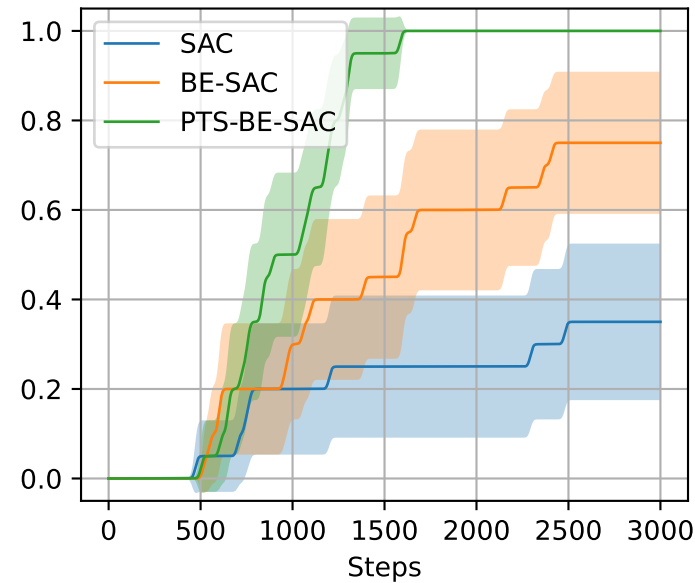

Double U-Shape

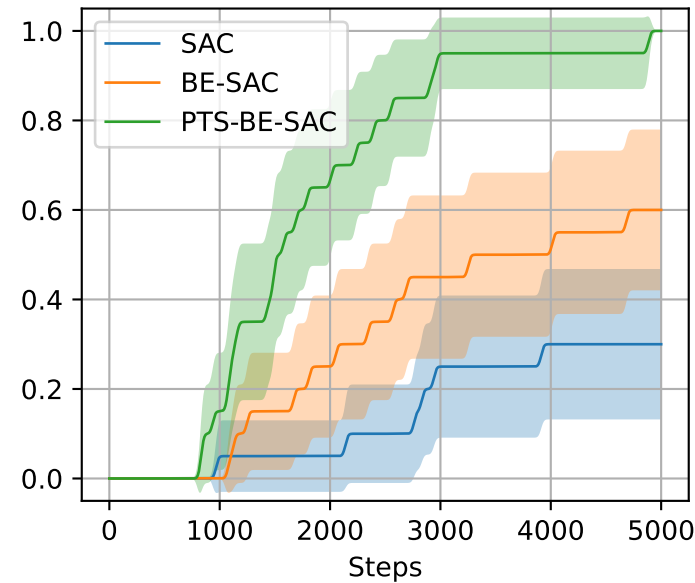

Obstacles

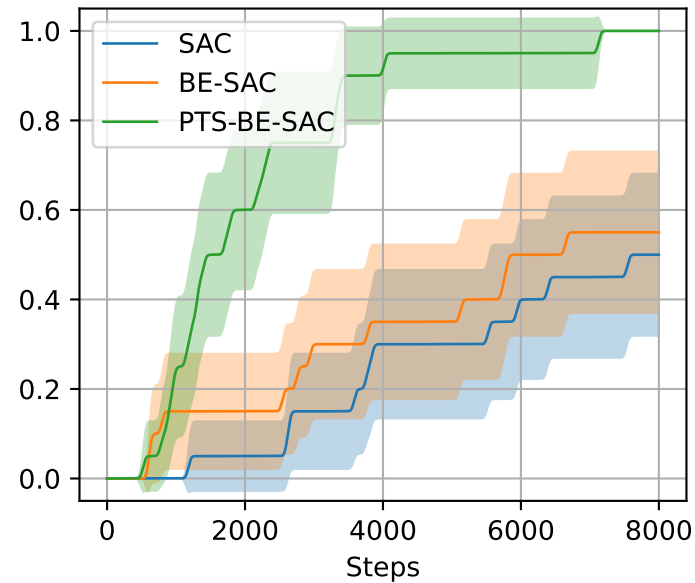

Supplement: supplementary_material [file maze_solved_prob.pdf › BayesExp-main/maze_envs/maze_solved_prob.pdf]

Error

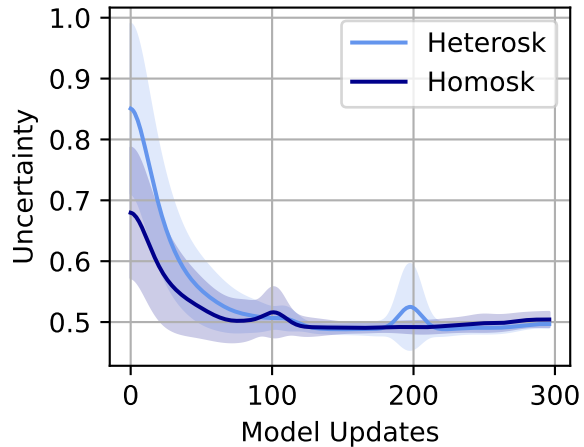

Entropy

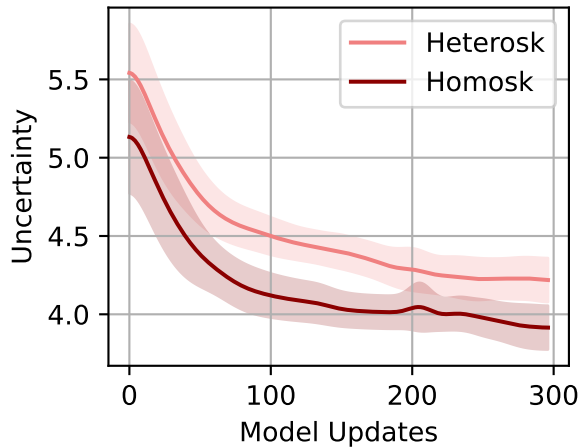

EIG

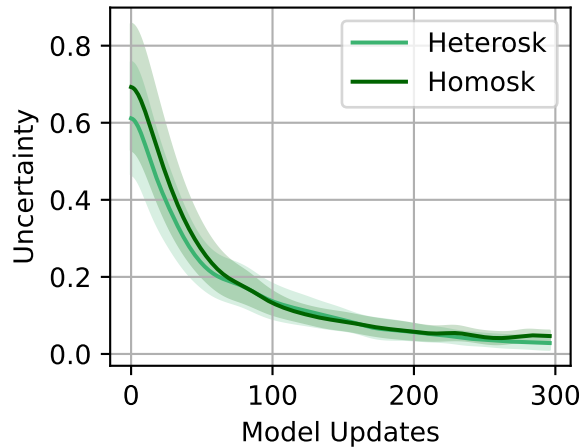

Supplement: supplementary_material [file hh_uncertainty.pdf › BayesExp-main/mount_car/hh_uncertainty.pdf]

BE

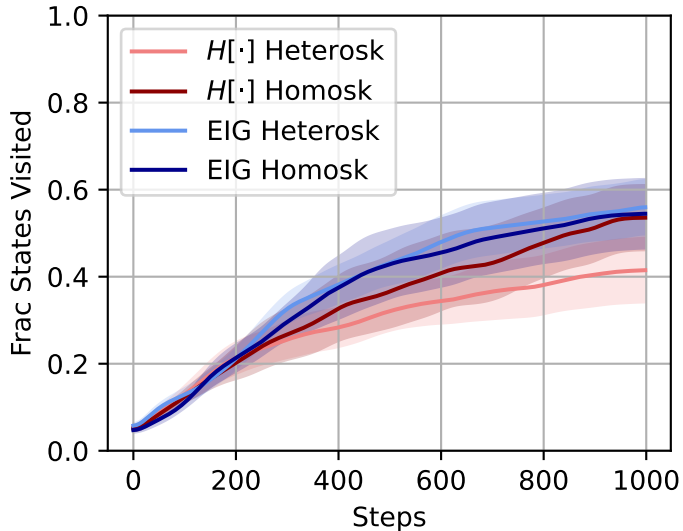

PTS-BE

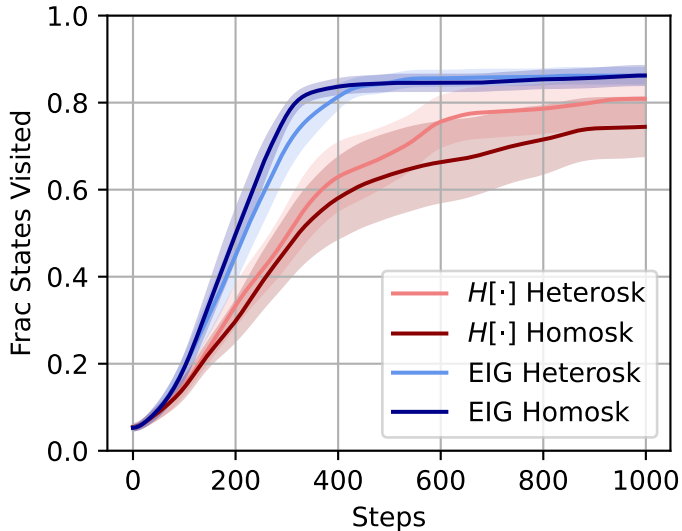

Supplement: supplementary_material [file mpc_MC.pdf › BayesExp-main/mount_car/mpc_MC.pdf]
